# Supplementary material for: Proteomic Analysis of the Resistance Mechanisms in Sugarcane during Sporisorium scitamineum Infection
Source: PubMed Central journal article supplement (PMC6387155; doi:10.3390/ijms20030569), 2019-01-29
Supplement: ijms-20-00569-s001.pdf [file ijms-20-00569-s001.pdf]

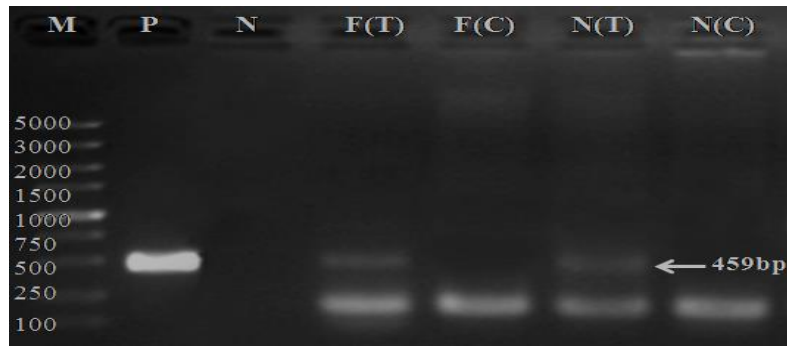

**Figure S1.** PCR amplification products of DNA isolated from control and smut inoculated sugarcane plantlets after 30 days, and *S. scitamineum* bE mating-type gene fragment is amplified at 459 bp. M, Molecular size marker (100 bp-5000 bp); P, positive control (*S. scitamineum*); N, negative control (Sterile water); F134; F(T) treatment and F(C) control; NCo310; N(T) treatment and N(C) control.

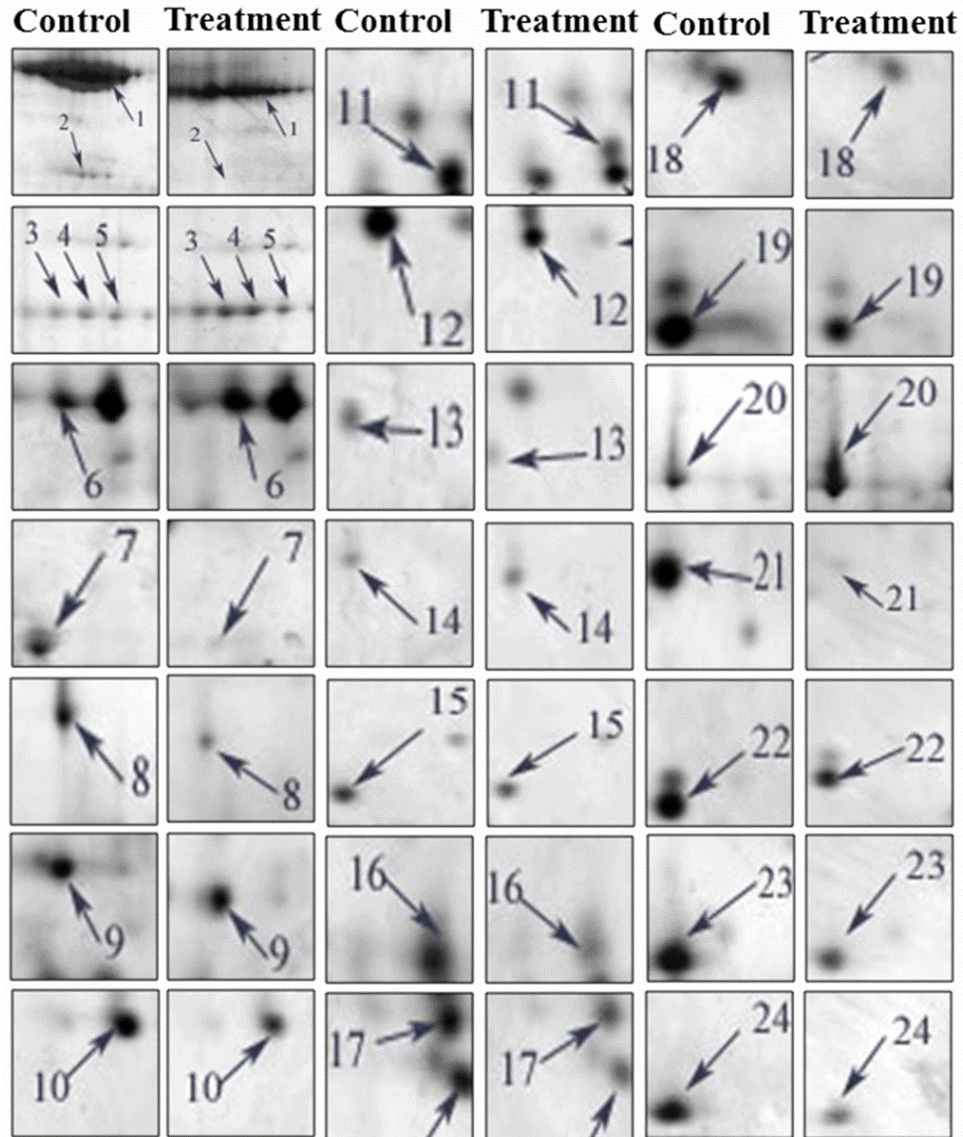

**Figure S2.** Comparative image (control and treatment) of differentially expressed proteins obtained from 2-DE gel in sugarcane variety F134 after *Sporisorium scitamineum* inoculation after 60 days.

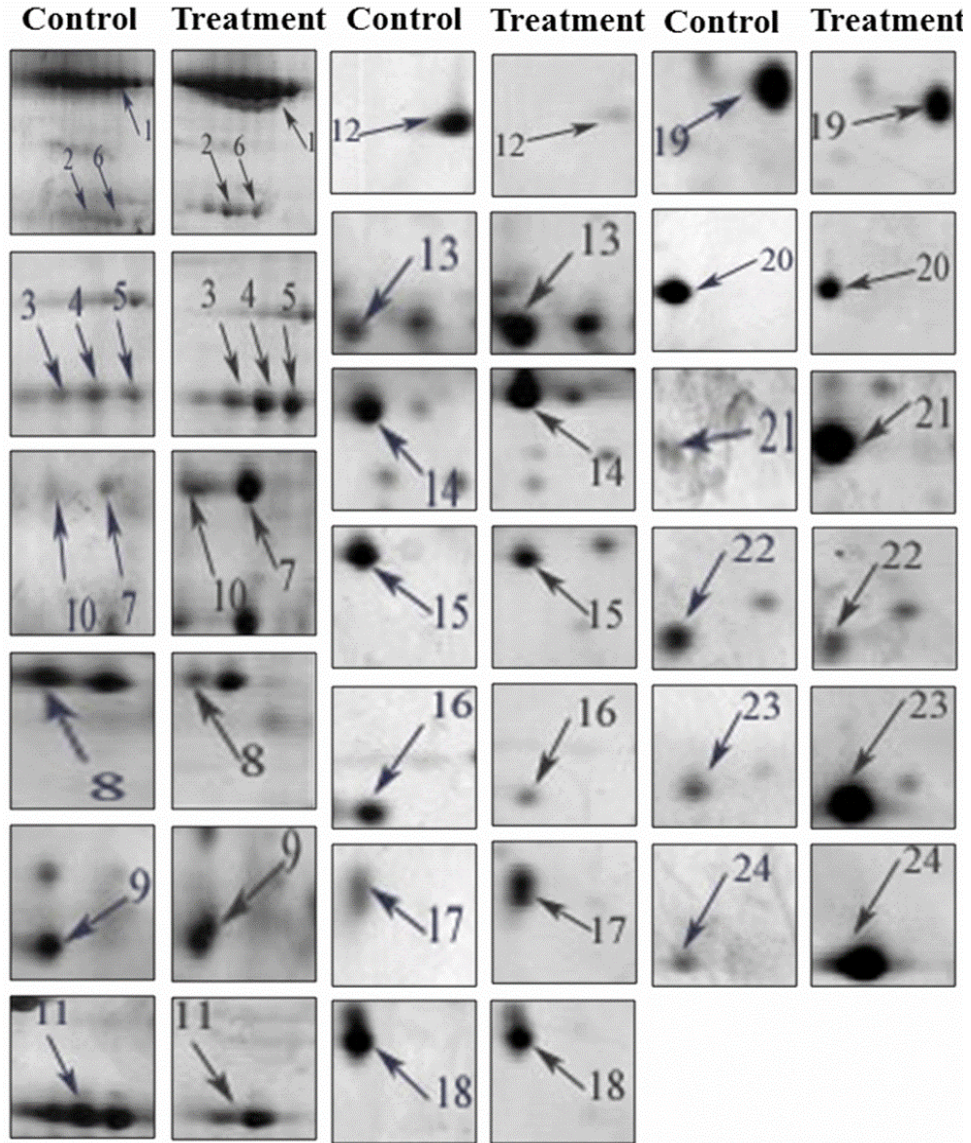

**Figure S3.** Comparative image (control and treatment) of differentially expressed proteins obtained from 2-DE gel in sugarcane variety NCo310 after *Sporisorium scitamineum* inoculation after 60 days.

**Table S1.** Functional characterization and classification of identified protein spots in both sugarcane varieties.

| S. No. | Molecular Function                              | Sugarcane Varieties |      |
|--------|-------------------------------------------------|---------------------|------|
|        |                                                 | NCo310              | F134 |
| 1.     | ATP Binding                                     | 4                   | 4    |
| 2.     | Kinase Activity                                 | 1                   | 1    |
| 3.     | Metalion Binding                                | 1                   | 2    |
| 4.     | Pyruvate, Phosphate Dikinase Activity           | 1                   | 1    |
| 5.     | Transketolase Activity                          | 2                   | 2    |
| 6.     | Calciumion Binding                              | 1                   | 1    |
| 7.     | Cobaltion Binding                               | 1                   | 1    |
| 8.     | Manganese Ion Binding                           | 2                   | 1    |
| 9.     | Phosphoglycerate Kinase Activity                |                     | 1    |
| 10.    | Gtpase Activity                                 | 1                   | 1    |
| 11.    | GTP Binding                                     | 1                   | 1    |
| 12.    | Translation Elongation Factor Activity          | 1                   | 1    |
| 13.    | Phosphoglycerate Kinase Activity                |                     | 1    |
| 14.    | Nucleic Acid Binding                            | 1                   | 1    |
| 15.    | Nucleotide Binding                              | 1                   | 1    |
| 16.    | Peroxidase Activity                             |                     | 1    |
| 17.    | DNA Binding                                     |                     | 1    |
| 18.    | Hydrogen Ion Transmembrane Transporter Activity |                     | 1    |
| 19.    | Superoxide Dismutase Activity                   |                     | 1    |
| 20.    | Monoxygenase Activity                           | 1                   | 1    |
| 21.    | Ribulose-Bisphosphate Carboxylase Activity      | 1                   | 1    |
| 22.    | Nutrient Reservoir Activity                     | 1                   |      |
| <hr/>  |                                                 |                     |      |
| S. No. | Biological Process                              |                     |      |
| 1.     | Pyruvate Metabolic Process                      | 1                   | 1    |
| 2.     | Metabolic Process                               | 1                   | 1    |
| 3.     | Reductive Pentose-Phosphate Cycle               | 1                   | 1    |

|               |                                                                 |   |   |
|---------------|-----------------------------------------------------------------|---|---|
| 4.            | Glycolytic Process                                              |   | 2 |
| 5.            | Response to Glucose                                             |   | 1 |
| 6.            | Response to Heat                                                |   | 1 |
| 7.            | Response to Light Stimulus                                      |   | 1 |
| 8.            | Response to Molecule of Bacterial Origin                        |   | 1 |
| 9.            | ATP Synthesis Coupled Proton Transport                          |   | 1 |
| 10.           | Defense Response to Bacterium                                   |   | 1 |
| 11.           | Response to Cytokinin                                           |   | 1 |
| 12.           | Photorespiration                                                | 1 | 1 |
| 13.           | Reductive Pentose-Phosphate Cycle                               | 1 | 1 |
| 14.           | Protein Refolding                                               | 1 |   |
| <hr/>         |                                                                 |   |   |
| <b>S. No.</b> | <b>Cellular Component</b>                                       |   |   |
| <hr/>         |                                                                 |   |   |
| 1.            | Chloroplast Thylakoid Membrane                                  | 1 | 2 |
| 2.            | Intracellular                                                   | 1 | 1 |
| 3.            | Apoplast                                                        |   | 1 |
| 4.            | Chloroplast Stroma                                              |   | 1 |
| 5.            | Cytosol                                                         |   | 1 |
| 6.            | Nucleus                                                         |   | 1 |
| 7.            | Plasma Membrane                                                 |   | 1 |
| 8.            | Plasmodesma                                                     |   | 1 |
| 9.            | Vacuolar Membrane                                               |   | 1 |
| 10.           | Intracellular Ribonucleoprotein Complex                         | 1 | 1 |
| 11.           | Viral Nucleocapsid                                              | 1 | 1 |
| 12.           | Chloroplast Envelope                                            |   | 1 |
| 13.           | Integral Component of Membrane                                  |   | 1 |
| 14.           | Proton-Transporting ATP Synthase Complex, Coupling Factor F (O) |   | 1 |
| 15.           | Chloroplast                                                     | 1 | 2 |
| 16.           | Cytoplasm                                                       | 1 |   |
| 17.           | Extracellular Region                                            | 1 |   |
| <hr/>         |                                                                 |   |   |
